# Supplementary material
Source: publisher figshare collection journal article supplement (https://springernature.figshare.com/ndownloader/files/15588860)
Supplement: Supplementary file 1 [file 15588860]

Table A1 Import pipeline facilities in China

| Name | Import capability(bcm/year) | Status | Entry province |
| --- | --- | --- | --- |
| China-Central Asia A/B | 300 | In operation | Xinjiang |
| China-Central Asia C | 250 | In operation | Xinjiang |
| China-Myanmar | 120 | In operation | Yunnan |
| China-Russia East | 380 | Under-construction | Heilongjiang |
| China-Central Asia D | 300 | Planned | Xinjiang |
